# Supplementary figures and images for: A chiral screw propeller-like scalene triangle manganese(iii) cluster
Source: Royal Society of Chemistry journal article supplement (doi:10.1039/b913062d), 2010-01-01

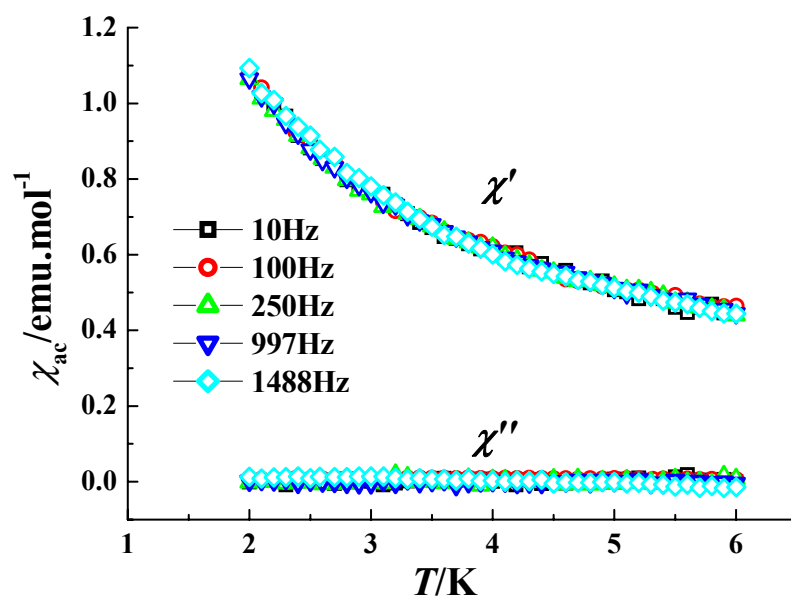

Fig. S1. Ac susceptibilities of 1 measured in an ac field of 2.5 Oe.

Supplement: b913062d.pdf [file b913062d.pdf]
